# Supplementary material for: A series of mixed-ligand 2D and 3D coordination polymers assembled from a novel multifunctional pyridine-tricarboxylate building block: hydrothermal syntheses, structural and topological diversity, and magnetic and luminescent properties
Source: Royal Society of Chemistry journal article supplement (doi:10.1039/c5ra13582f), 2015-01-01
Supplement: c5ra13582f1.pdf [file c5ra13582f1.pdf]

## Electronic Supplementary Information (ESI)

# **A series of mixed-ligand 2D and 3D coordination polymers assembled from a novel multifunctional pyridine-tricarboxylate building block: hydrothermal syntheses, structural and topological diversity, and magnetic and luminescent properties**

Jinzhong Gu,<sup>\*a</sup> Yanhui Cui,<sup>a</sup> Jiang Wu,<sup>a</sup> and Alexander Kirillov<sup>b</sup>

<sup>a</sup> Key Laboratory of Nonferrous Metal Chemistry and Resources Utilization of Gansu Province and College of Chemistry and Chemical Engineering, Lanzhou University, Lanzhou, 730000 (P. R. China)

Fax: (+86) 931-891-5196

E-mail: [gujzh@lzu.edu.cn](mailto:gujzh@lzu.edu.cn)

<sup>b</sup> Centro de Química Estrutural, Complexo I, Instituto Superior Técnico, The University of Lisbon, Av. Rovisco Pais, 1049-001, Lisbon (Portugal)

**Table S1** Selected bond lengths [ $\text{\AA}$ ] and angles [ $^\circ$ ] for the compounds **1-6<sup>a</sup>**.

| <b>1</b>              |            |                     |            |                    |            |
|-----------------------|------------|---------------------|------------|--------------------|------------|
| Cd(1)-O(1)            | 2.458(3)   | Cd(1)-O(2)          | 2.345(3)   | Cd(1)-O(6)#1       | 2.245(3)   |
| Cd(1)-O(7)            | 2.195(2)   | Cd(1)-N(2)          | 2.418(4)   | Cd(1)-N(3)         | 2.351(3)   |
| Cd(2)-O(3)#3          | 2.279(3)   | Cd(2)-O(5)#1        | 2.336(3)   | Cd(2)-O(7)         | 2.280(2)   |
| Cd(2)-O(7)#2          | 2.275(2)   | Cd(2)-N(4)          | 2.433(3)   | Cd(2)-N(5)         | 2.338(3)   |
| O(7)-Cd(1)-O(6)#1     | 107.28(10) | O(7)-Cd(1)-O(2)     | 96.51(9)   | O(6)#1-Cd(1)-O(2)  | 103.81(11) |
| O(7)-Cd(1)-N(3)       | 108.00(10) | O(6)#1-Cd(1)-N(3)   | 88.26(12)  | O(2)-Cd(1)-N(3)    | 148.19(11) |
| O(7)-Cd(1)-N(2)       | 98.57(10)  | O(6)#1-Cd(1)-N(2)   | 150.48(11) | O(2)-Cd(1)-N(2)    | 86.82(12)  |
| N(3)-Cd(1)-N(2)       | 70.04(12)  | O(7)-Cd(1)-O(1)     | 150.51(9)  | O(6)#1-Cd(1)-O(1)  | 87.01(10)  |
| O(2)-Cd(1)-O(1)       | 54.46(9)   | N(3)-Cd(1)-O(1)     | 97.87(10)  | N(2)-Cd(1)-O(1)    | 76.84(11)  |
| O(7)#2-Cd(2)-O(3)#3   | 90.46(9)   | O(7)#2-Cd(2)-O(7)   | 81.84(9)   | O(3)#3-Cd(2)-O(7)  | 97.52(9)   |
| O(7)#2-Cd(2)-O(5)#1   | 167.74(10) | O(3)#3-Cd(2)-O(5)#1 | 80.68(10)  | O(7)-Cd(2)-O(5)#1  | 90.88(9)   |
| O(7)#2-Cd(2)-N(5)     | 105.88(10) | O(3)#3-Cd(2)-N(5)   | 155.19(11) | O(7)-Cd(2)-N(5)    | 103.12(10) |
| O(5)#1-Cd(2)-N(5)     | 85.33(11)  | O(7)#2-Cd(2)-N(4)   | 105.27(11) | O(3)#3-Cd(2)-N(4)  | 87.39(11)  |
| O(7)-Cd(2)-N(4)       | 171.40(11) | O(5)#1-Cd(2)-N(4)   | 82.91(11)  | N(5)-Cd(2)-N(4)    | 70.54(12)  |
| Cd(1)-O(7)-Cd(2)      | 111.62(9)  | Cd(1)-O(7)-Cd(2)#2  | 127.32(12) | Cd(2)#2-O(7)-Cd(2) | 98.16(9)   |
| <b>2</b>              |            |                     |            |                    |            |
| Mn(1)-O(1)            | 2.191(4)   | Mn(1)-O(8)          | 2.194(4)   | Mn(1)-O(12)#1      | 2.139(4)   |
| Mn(1)-O(13)           | 2.198(5)   | Mn(1)-N(3)          | 2.270(5)   | Mn(1)-N(4)         | 2.354(5)   |
| Mn(2)-O(2)            | 2.135(5)   | Mn(2)-O(7)          | 2.156(5)   | Mn(2)-O(9)#3       | 2.185(4)   |
| Mn(2)-O(10)#3         | 2.304(4)   | Mn(2)-O(11)#2       | 2.115(4)   | Mn(3)-O(3)         | 2.053(6)   |
| Mn(3)-O(4)#4          | 2.114(5)   | Mn(3)-O(5)#5        | 2.464(8)   | Mn(3)-O(6)#5       | 2.217(6)   |
| Mn(3)-N(5)            | 2.280(6)   | Mn(3)-N(6)          | 2.259(6)   |                    |            |
| O(12)#1-Mn(1)-O(1)    | 84.74(16)  | O(12)#1-Mn(1)-O(8)  | 94.53(16)  | O(1)-Mn(1)-O(8)    | 82.92(18)  |
| O(12)#1-Mn(1)-O(13)   | 85.94(17)  | O(1)-Mn(1)-O(13)    | 168.66(17) | O(8)-Mn(1)-O(13)   | 91.4(2)    |
| O(12)#1-Mn(1)-N(3)    | 177.54(19) | O(1)-Mn(1)-N(3)     | 97.63(17)  | O(8)-Mn(1)-N(3)    | 85.15(17)  |
| O(13)-Mn(1)-N(3)      | 91.63(19)  | O(12)#1-Mn(1)-N(4)  | 108.83(18) | O(1)-Mn(1)-N(4)    | 86.64(18)  |
| O(8)-Mn(1)-N(4)       | 153.39(17) | O(13)-Mn(1)-N(4)    | 102.52(19) | N(3)-Mn(1)-N(4)    | 72.04(19)  |
| O(11)#2-Mn(2)-O(2)    | 93.11(18)  | O(11)#2-Mn(2)-O(7)  | 101.31(18) | O(2)-Mn(2)-O(7)    | 94.0(2)    |
| O(11)#2-Mn(2)-O(9)#3  | 99.80(16)  | O(2)-Mn(2)-O(9)#3   | 109.72(18) | O(7)-Mn(2)-O(9)#3  | 147.11(18) |
| O(11)#2-Mn(2)-O(10)#3 | 85.65(17)  | O(2)-Mn(2)-O(10)#3  | 167.51(19) | O(7)-Mn(2)-O(10)#3 | 98.41(18)  |
| O(9)#3-Mn(2)-O(10)#3  | 58.44(17)  | O(3)-Mn(3)-O(4)#4   | 107.0(3)   | O(3)-Mn(3)-O(6)#5  | 135.2(2)   |
| O(4)#4-Mn(3)-O(6)#5   | 82.3(2)    | O(3)-Mn(3)-N(6)     | 108.1(2)   | O(4)#4-Mn(3)-N(6)  | 138.3(2)   |
| O(6)#5-Mn(3)-N(6)     | 88.5(2)    | O(3)-Mn(3)-N(5)     | 88.8(2)    | O(4)#4-Mn(3)-N(5)  | 86.3(2)    |
| O(6)#5-Mn(3)-N(5)     | 135.9(2)   | N(6)-Mn(3)-N(5)     | 72.6(2)    | O(3)-Mn(3)-O(5)#5  | 84.0(2)    |
| O(4)#4-Mn(3)-O(5)#5   | 116.3(2)   | O(6)#5-Mn(3)-O(5)#5 | 54.1(2)    | N(6)-Mn(3)-O(5)#5  | 89.4(2)    |
| N(5)-Mn(3)-O(5)#5     | 157.5(3)   |                     |            |                    |            |
| <b>3</b>              |            |                     |            |                    |            |
| Cd(1)-O(4)            | 2.394(5)   | Cd(1)-N(1)          | 2.308(5)   | Cd(1)-N(2)         | 2.317(6)   |
| Cd(1)-N(3)            | 2.303(6)   | Cd(1)-N(6)          | 2.485(6)   | Cd(1)-N(7)         | 2.291(6)   |
| Cd(2)-O(1)#2          | 2.528(6)   | Cd(2)-O(2)#2        | 2.287(5)   | Cd(2)-O(5)#1       | 2.212(5)   |
| Cd(2)-N(5)            | 2.344(6)   | Cd(2)-N(10)         | 2.357(6)   | Cd(2)-N(11)        | 2.411(8)   |
| N(7)-Cd(1)-N(3)       | 106.5(2)   | N(7)-Cd(1)-N(1)     | 152.3(2)   | N(3)-Cd(1)-N(1)    | 95.98(19)  |

|                     |            |                     |            |                     |           |
|---------------------|------------|---------------------|------------|---------------------|-----------|
| N(7)-Cd(1)-N(2)     | 94.1(2)    | N(3)-Cd(1)-N(2)     | 73.77(19)  | N(1)-Cd(1)-N(2)     | 107.8(2)  |
| N(7)-Cd(1)-O(4)     | 84.7(2)    | N(3)-Cd(1)-O(4)     | 168.62(19) | N(1)-Cd(1)-O(4)     | 72.73(19) |
| N(2)-Cd(1)-O(4)     | 107.75(19) | N(7)-Cd(1)-N(6)     | 72.5(2)    | N(3)-Cd(1)-N(6)     | 89.72(19) |
| N(1)-Cd(1)-N(6)     | 92.03(19)  | N(2)-Cd(1)-N(6)     | 155.1(2)   | O(4)-Cd(1)-N(6)     | 92.14(18) |
| O(5)#1-Cd(2)-O(2)#2 | 154.7(2)   | O(5)#1-Cd(2)-N(5)   | 93.51(19)  | O(2)#2-Cd(2)-N(5)   | 93.86(18) |
| O(5)#1-Cd(2)-N(10)  | 90.7(2)    | O(2)#2-Cd(2)-N(10)  | 113.3(2)   | N(5)-Cd(2)-N(10)    | 91.3(2)   |
| O(5)#1-Cd(2)-N(11)  | 89.8(2)    | O(2)#2-Cd(2)-N(11)  | 90.5(2)    | N(5)-Cd(2)-N(11)    | 162.3(3)  |
| N(10)-Cd(2)-N(11)   | 71.3(3)    | O(5)#1-Cd(2)-O(1)#2 | 101.5(2)   | O(2)#2-Cd(2)-O(1)#2 | 53.6(2)   |
| N(5)-Cd(2)-O(1)#2   | 115.3(2)   | N(10)-Cd(2)-O(1)#2  | 149.6(3)   | N(11)-Cd(2)-O(1)#2  | 80.9(3)   |

#### 4

|                   |            |                   |            |                     |            |
|-------------------|------------|-------------------|------------|---------------------|------------|
| Pb(1)-O(1)        | 2.570(5)   | Pb(1)-O(2)        | 2.665(6)   | Pb(1)-O(6)#1        | 2.624(7)   |
| Pb(1)-O(7)#2      | 2.596(5)   | Pb(1)-O(7)        | 2.620(6)   | Pb(1)-N(2)          | 2.799(7)   |
| Pb(1)-N(3)        | 2.720(8)   | Pb(2)-O(3)        | 2.647(6)   | Pb(2)-O(4)          | 2.350(6)   |
| Pb(2)-O(5)#3      | 2.441(6)   | Pb(2)-N(4)        | 2.615(7)   | Pb(2)-N(5)          | 2.556(7)   |
| O(1)-Pb(1)-O(2)   | 49.7(2)    | O(1)-Pb(1)-O(6)#1 | 75.02(19)  | O(1)-Pb(1)-O(7)#2   | 135.53(19) |
| O(1)-Pb(1)-O(7)   | 127.89(19) | O(1)-Pb(1)-N(2)   | 138.9(2)   | O(1)-Pb(1)-N(3)     | 82.2(2)    |
| O(2)-Pb(1)-N(2)   | 136.6(2)   | O(2)-Pb(1)-N(3)   | 90.0(2)    | O(6)#1-Pb(1)-O(2)   | 122.84(19) |
| O(6)#1-Pb(1)-N(2) | 93.0(2)    | O(6)#1-Pb(1)-N(3) | 96.4(2)    | O(7)#2-Pb(1)-O(2)   | 117.1(2)   |
| O(7)-Pb(1)-O(2)   | 79.08(19)  | O(7)-Pb(1)-O(6)#1 | 156.95(17) | O(7)#2-Pb(1)-O(6)#1 | 90.62(19)  |
| O(7)#2-Pb(1)-O(7) | 71.1(2)    | O(7)#2-Pb(1)-N(2) | 82.5(2)    | O(7)-Pb(1)-N(2)     | 71.2(2)    |
| O(7)-Pb(1)-N(3)   | 90.2(2)    | O(7)#2-Pb(1)-N(3) | 141.9(2)   | N(3)-Pb(1)-N(2)     | 59.8(2)    |
| O(4)-Pb(2)-O(3)   | 52.13(19)  | O(4)-Pb(2)-O(5)#3 | 76.6(2)    | O(4)-Pb(2)-N(4)     | 72.2(2)    |
| O(4)-Pb(2)-N(5)   | 82.1(2)    | O(5)#3-Pb(2)-O(3) | 110.7(2)   | O(5)#3-Pb(2)-N(4)   | 131.9(2)   |
| O(5)#3-Pb(2)-N(5) | 76.0(2)    | N(4)-Pb(2)-O(3)   | 76.8(2)    | N(5)-Pb(2)-O(3)     | 127.5(2)   |
| N(5)-Pb(2)-N(4)   | 64.3(2)    |                   |            |                     |            |

#### 5

|                     |            |                   |            |                   |            |
|---------------------|------------|-------------------|------------|-------------------|------------|
| Cd(1)-O(1)          | 2.281(4)   | Cd(1)-O(4)#1      | 2.233(4)   | Cd(1)-O(7)        | 2.531(5)   |
| Cd(1)-O(8)          | 2.262(4)   | Cd(1)-N(4)        | 2.344(4)   | Cd(1)-N(5)        | 2.381(4)   |
| Cd(2)-O(1)          | 2.316(4)   | Cd(2)-O(2)        | 2.533(19)  | Cd(2)-O(3)#1      | 2.373(4)   |
| Cd(2)-O(5)#2        | 2.236(6)   | Cd(2)-N(3)        | 2.352(6)   | Cd(2)-N(2)        | 2.319(5)   |
| O(4)#1-Cd(1)-O(8)   | 98.72(18)  | O(4)#1-Cd(1)-O(1) | 90.64(17)  | O(8)-Cd(1)-O(1)   | 135.51(16) |
| O(4)#1-Cd(1)-N(4)   | 148.58(17) | O(8)-Cd(1)-N(4)   | 98.47(17)  | O(1)-Cd(1)-N(4)   | 95.25(15)  |
| O(4)#1-Cd(1)-N(5)   | 79.90(16)  | O(8)-Cd(1)-N(5)   | 106.34(16) | O(1)-Cd(1)-N(5)   | 118.12(14) |
| N(4)-Cd(1)-N(5)     | 70.10(17)  | O(4)#1-Cd(1)-O(7) | 125.6(2)   | O(8)-Cd(1)-O(7)   | 52.94(17)  |
| O(1)-Cd(1)-O(7)     | 86.49(17)  | N(4)-Cd(1)-O(7)   | 85.6(2)    | N(5)-Cd(1)-O(7)   | 146.05(18) |
| O(5)#2-Cd(2)-N(2)   | 118.6(2)   | O(5)#2-Cd(2)-O(1) | 108.3(2)   | N(2)-Cd(2)-O(1)   | 109.13(18) |
| O(5)#2-Cd(2)-N(3)   | 135.9(2)   | N(2)-Cd(2)-N(3)   | 71.7(2)    | O(1)-Cd(2)-N(3)   | 107.20(16) |
| O(5)#2-Cd(2)-O(3)#1 | 80.73(19)  | N(2)-Cd(2)-O(3)#1 | 151.62(18) | O(1)-Cd(2)-O(3)#1 | 80.84(14)  |
| N(3)-Cd(2)-O(3)#1   | 79.96(18)  | O(5)#2-Cd(2)-O(2) | 81.9(4)    | N(2)-Cd(2)-O(2)   | 85.5(5)    |
| O(1)-Cd(2)-O(2)     | 51.4(4)    | N(3)-Cd(2)-O(2)   | 141.8(4)   | O(3)#1-Cd(2)-O(2) | 119.4(5)   |
| Cd(1)-O(1)-Cd(2)    | 117.63(16) |                   |            |                   |            |

#### 6

|                   |           |                     |          |                   |          |
|-------------------|-----------|---------------------|----------|-------------------|----------|
| Zn(1)-O(3)        | 1.995(6)  | Zn(1)-O(4)#1        | 1.972(5) | Zn(1)-O(6)#2      | 1.935(5) |
| Zn(1)-N(1)        | 2.037(6)  | Zn(2)-O(1)          | 2.063(6) | Zn(2)-O(2)        | 2.412(7) |
| Zn(2)-O(7)        | 2.313(10) | Zn(2)-O(8)          | 2.109(9) | Zn(2)-N(3)        | 2.054(8) |
| Zn(2)-N(2)        | 2.065(6)  |                     |          |                   |          |
| O(3)-Zn(1)-N(1)   | 96.1(2)   | O(4)#2-Zn(1)-O(3)   | 93.9(2)  | O(4)#2-Zn(1)-N(1) | 105.2(2) |
| O(6)#1-Zn(1)-O(3) | 109.9(2)  | O(6)#1-Zn(1)-O(4)#2 | 140.3(2) | O(6)#1-Zn(1)-N(1) | 103.3(3) |
| O(1)-Zn(2)-O(2)   | 57.9(2)   | O(1)-Zn(2)-O(7)     | 155.9(3) | O(1)-Zn(2)-O(8)   | 101.7(3) |
| O(1)-Zn(2)-N(2)   | 101.8(3)  | O(7)-Zn(2)-O(2)     | 105.5(3) | O(8)-Zn(2)-O(2)   | 87.8(3)  |

|                 |         |                 |         |                 |          |
|-----------------|---------|-----------------|---------|-----------------|----------|
| O(8)-Zn(2)-O(7) | 57.7(3) | N(3)-Zn(2)-O(1) | 99.1(3) | N(3)-Zn(2)-O(2) | 157.0(3) |
| N(3)-Zn(2)-O(7) | 96.5(4) | N(3)-Zn(2)-O(8) | 98.6(3) | N(3)-Zn(2)-N(2) | 96.3(3)  |
| N(2)-Zn(2)-O(2) | 88.7(3) | N(2)-Zn(2)-O(7) | 94.5(3) | N(2)-Zn(2)-O(8) | 149.7(3) |

<sup>a</sup> Symmetry transformations used to generate equivalent atoms: #1  $-x+1, -y+2, -z+1$ ; #2  $-x, -y+2, -z$ ; #3  $x, y+1, z$  for **1**; #1  $x-1/2, -y+1/2, z+1/2$ ; #2  $x+1/2, -y+1/2, z+1/2$ ; #3  $x+1/2, -y+1/2, z-1/2$ ; #4  $-x+2, -y, -z+1$ ; #5  $x+1, y, z$  for **2**; #1  $-x, y-1/2, -z+1/2$ ; #2  $-x+1/2, -y+1/2, -z+1/2$  for **3**; #1  $x+1, y, z-1$ ; #2  $-x+2, -y+1, -z$ ; #3  $-x, -y, -z+2$  for **4**; #1  $x+1, y, z$ ; #2  $-x+2, -y+2, -z$  for **5**; #1  $-x+2, y+1/2, -z+1/2$ ; #2  $-x+1, y+1/2, -z+1/2$  for **6**.

**Table S2** Hydrogen bonds in crystal packing [ $\text{\AA}$ ,  $^\circ$ ] of **1–4**.

| Complexes | D-H...A             | $d(\text{D-H})$ | $d(\text{H...A})$ | $d(\text{D...A})$ | $\angle \text{DHA}$ | Symmetry code            |
|-----------|---------------------|-----------------|-------------------|-------------------|---------------------|--------------------------|
| <b>1</b>  | O(7)-H(1)···O(4)    | 0.85            | 2.02              | 2.873             | 179.8               | $-x, -y+1, -z$           |
|           | O(8)-H(1W)···O(2)   | 0.85            | 2.07              | 2.924             | 179.6               | $-x+1, -y+1, -z+1$       |
|           | O(8)-H(2W)···O(4)   | 0.85            | 2.01              | 2.862             | 179.4               | $x+1, y, z+1$            |
| <b>2</b>  | O(14)-H(4W)···N(2)  | 0.86            | 1.77              | 2.628             | 176.6               | $-x-1/2, -y+1/2, z+1/2$  |
|           | O(13)-H(2W)···O(14) | 0.90            | 2.10              | 2.743             | 127.9               | $-x+1/2, -y+1/2, z-1/2$  |
|           | O(13)-H(1W)···O(10) | 0.90            | 1.81              | 2.708             | 173.3               | $x-1/2, -y+1/2, z-1/2$   |
| <b>3</b>  | N(13)-H(13)···O(6)  | 0.86            | 2.36              | 3.089             | 142.5               | $-x, y-3/2, -z+1/2$      |
|           | N(12)-H(12)···O(6)  | 0.86            | 1.88              | 2.686             | 155.0               | $-x, y-3/2, -z+1/2$      |
|           | N(9)-H(9)···O(4)    | 0.86            | 1.93              | 2.742             | 158.1               | $-x, -y, -z$             |
|           | N(8)-H(8)···O(3)    | 0.86            | 1.91              | 2.766             | 170.8               | $-x, -y, -z$             |
|           | N(4)-H(4)···O(2)    | 0.86            | 1.90              | 2.745             | 168.7               | $-x+1/2, -y+1/2, -z+1/2$ |
| <b>4</b>  | O(11)-H(1W)···O(3)  | 0.86            | 2.15              | 3.011             | 178.8               | $-x+1, -y+1, -z+1$       |

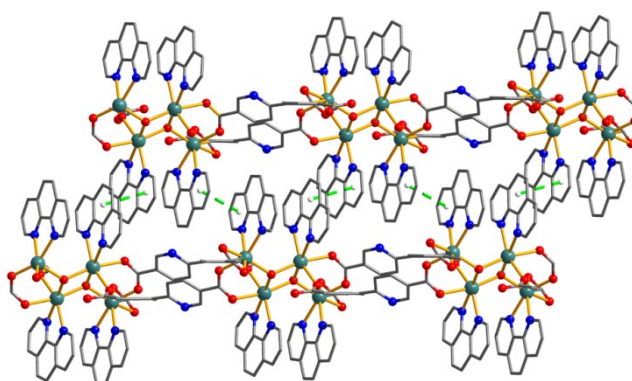

**Fig. S1** The  $\pi$ - $\pi$  stacking interactions in **1** (green dashed lines represent  $\pi$ - $\pi$  stacking interactions).

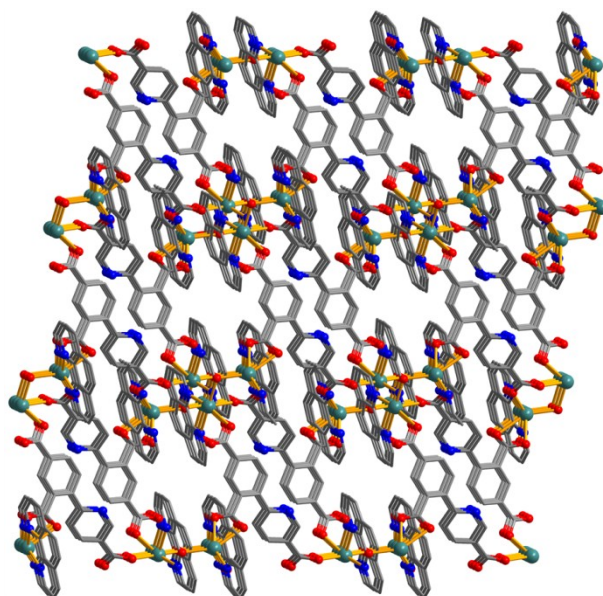

**Fig. S2** A perspective of 3D supramolecular framework in **1** (view along the *ab* plane).

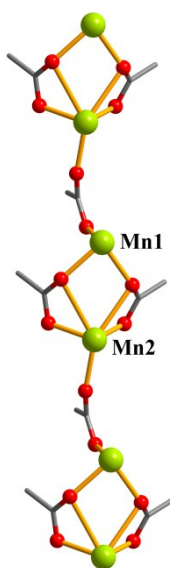

**Fig. S3** Bridging of the dimeric  $Mn_2$  units by carboxylate groups in **2**.

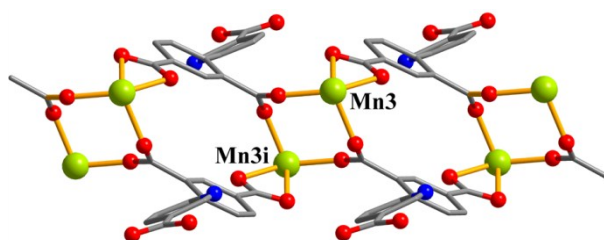

**Fig. S4** Bridging of the dimeric  $Mn_2$  units by  $L^{3-}$  ligands in **2**. Symmetry code:  $i = -x + 2, -y, -z + 1$ .

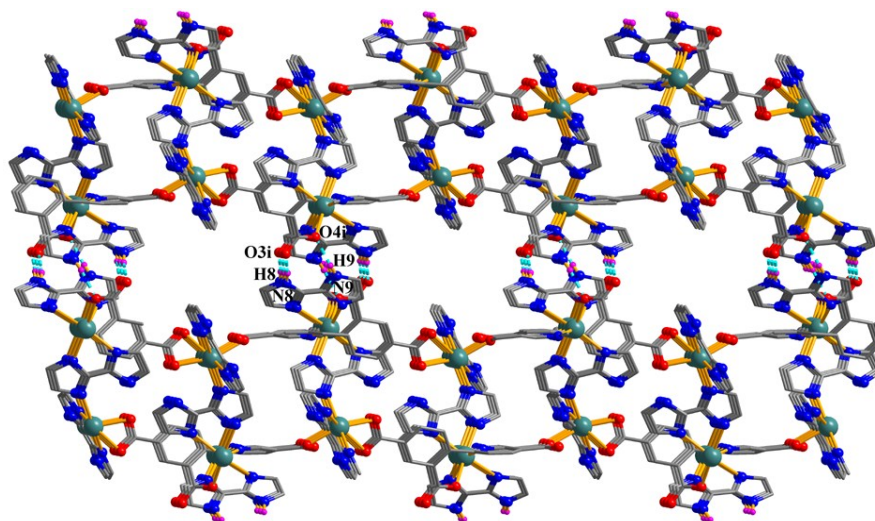

**Fig. S5** A perspective of 3D supramolecular framework in **3** (view along the *ab* plane; blue dashed lines represent the hydrogen bond). Symmetry code:  $i = -x, -y, -z$ .

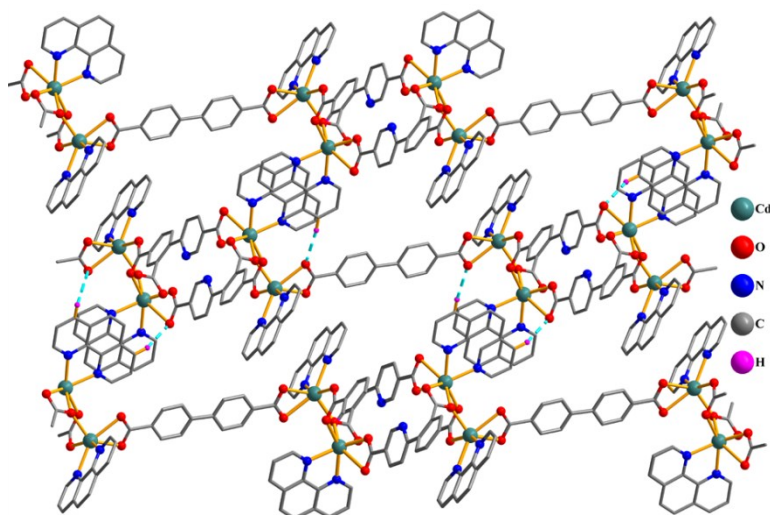

**Fig. S6** 3D supramolecular structure formed by hydrogen bonding interactions between the adjacent layers in **5** (blue dashed lines represent the C–H $\cdots$ O H-bond).

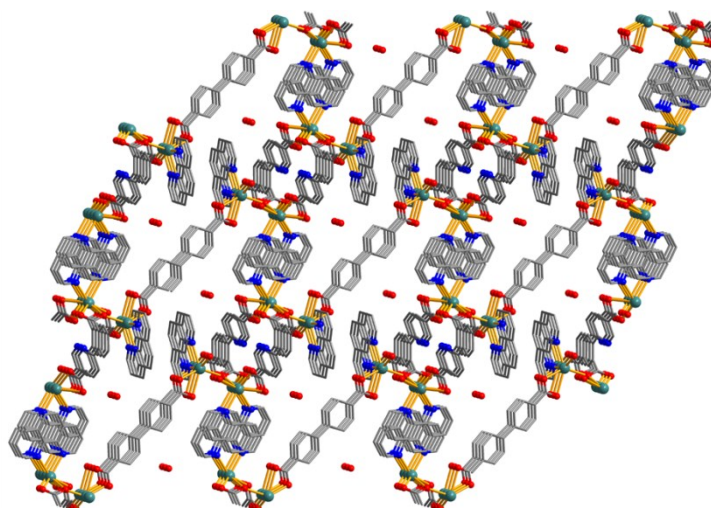

**Fig. S7** A perspective of 3D supramolecular framework of **5** along the *bc* plane.

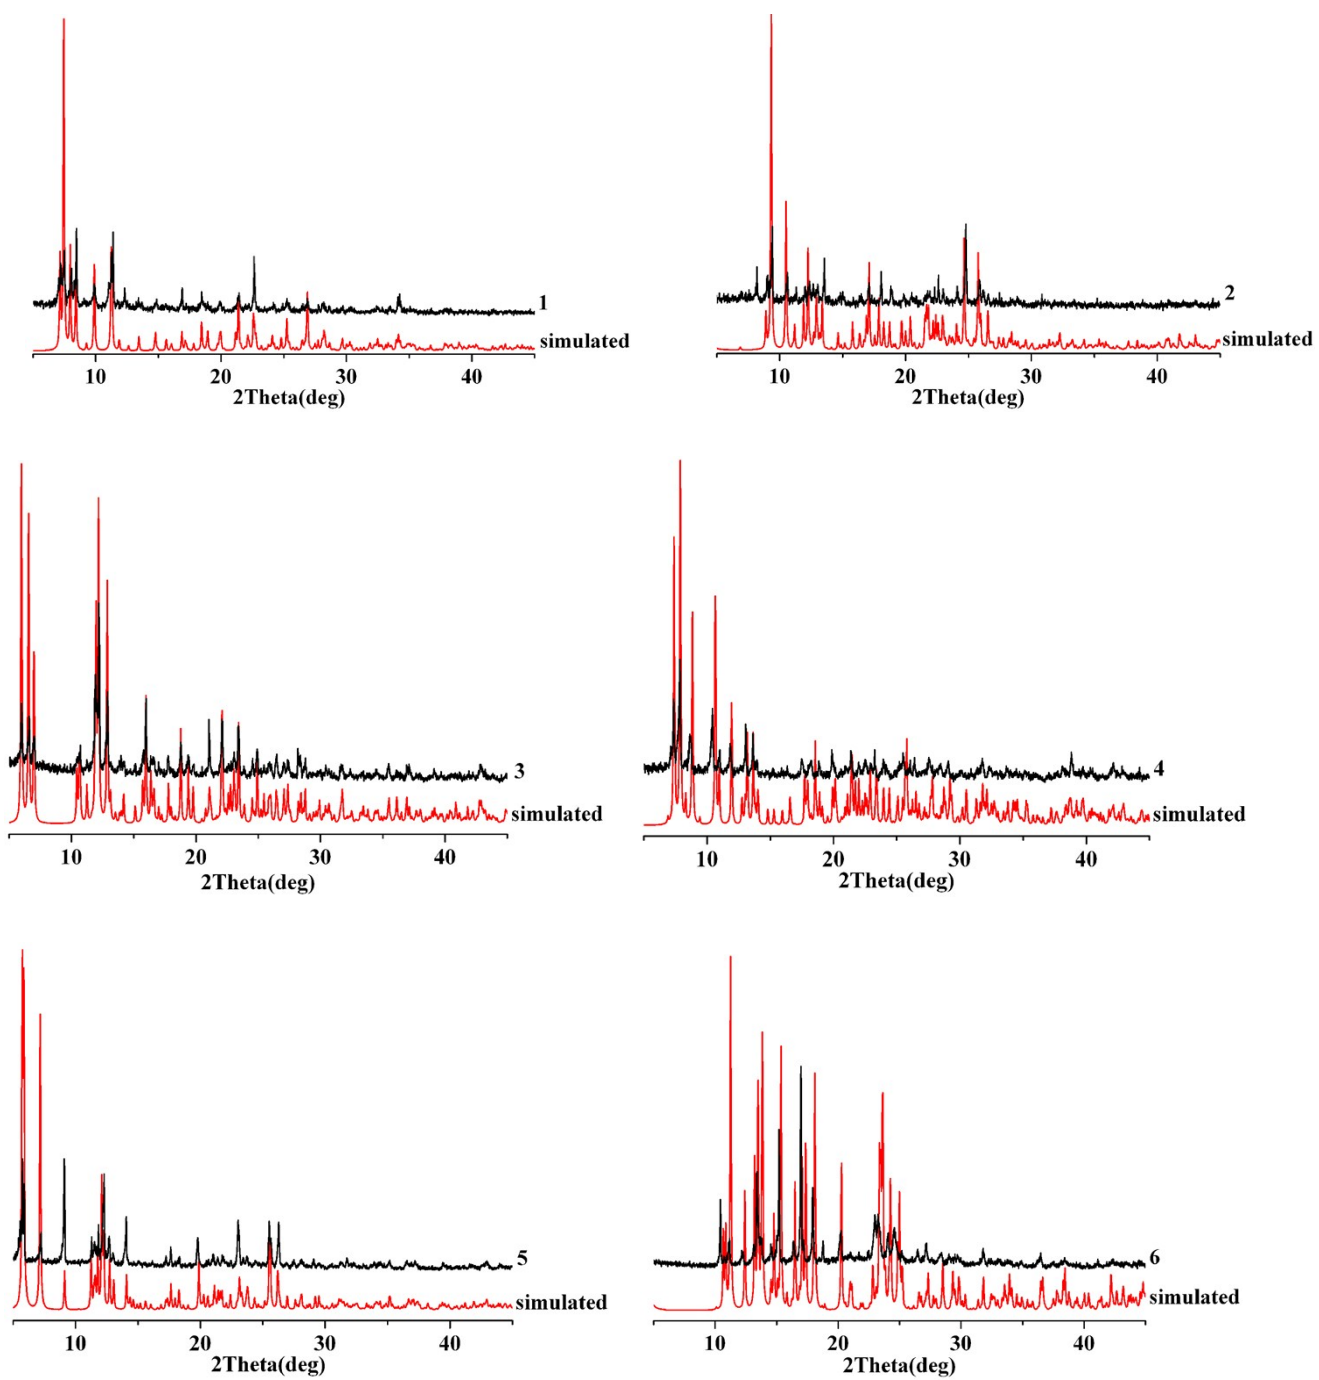

**Fig. S8** The PXR D patterns of compounds **1–6** at room temperature.



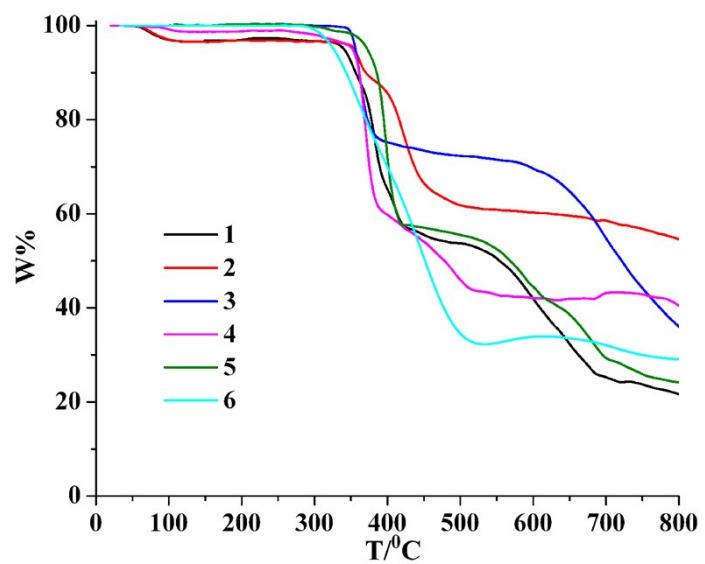

**Fig. S9** Thermogravimetric analysis (TGA) curves of compounds **1–6**.
